# Supplementary material for: Prevalence of Intracranial Aneurysm in Patients with Aortopathy: A Systematic Review with Meta-Analyses
Source: PubMed Central journal article supplement — J Stroke. 2020 Jan 31;22(1):76–86. doi: 10.5853/jos.2019.01312 (PMC7005354; doi:10.5853/jos.2019.01312), 2020-01-31
Supplement: jos-2019-01312-suppl2.pdf [file jos-2019-01312-suppl2.pdf]

**Supplementary Table 1.** Modified Newcastle-Ottawa scale for assessing the quality of included studies

| Study                                 | Study design    | Selection (max=4)     |                      |                 |                           | Comparability (max=2)       | Outcome (max=3)       |                  | Total score (max=9) |
|---------------------------------------|-----------------|-----------------------|----------------------|-----------------|---------------------------|-----------------------------|-----------------------|------------------|---------------------|
|                                       |                 | Representative sample | Sample size adequate | Non-respondents | Ascertainment of exposure | Based on design or analysis | Assessment of outcome | Statistical test |                     |
| Miyazawa et al. (2007) <sup>20</sup>  | Cross-sectional | ☺                     | ☺                    | -               | ☺                         | ☺☺                          | ☺                     | ☺                | 7                   |
| Goyal et al. (2015) <sup>19</sup>     | Cross-sectional | ☺                     | ☺                    | -               | ☺                         | ☺                           | ☺                     | ☺                | 6                   |
| Laukka et al. (2019) <sup>21</sup>    | Cross-sectional | ☺                     | ☺                    |                 | ☺                         | ☺☺                          | ☺                     | ☺                | 7                   |
| Connolly et al. (2003) <sup>11</sup>  | Cross-sectional | ☺                     | ☺                    | ☺               | ☺                         | ☺                           | ☺                     | ☺                | 7                   |
| Cook et al. (2013) <sup>9</sup>       | Cross-sectional | ☺                     | ☺                    | -               | ☺                         | ☺                           | ☺                     | ☺                | 6                   |
| Curtis et al. (2012) <sup>12</sup>    | Cross-sectional | ☺                     | ☺                    | -               | ☺                         | ☺☺                          | ☺                     | ☺                | 7                   |
| Egbe et al. (2017) <sup>13</sup>      | Cross-sectional | ☺                     | ☺                    | -               | ☺                         | ☺☺                          | ☺                     | ☺                | 7                   |
| Jung et al. (2017) <sup>3</sup>       | Cross-sectional | ☺                     | ☺                    | -               | ☺                         | ☺                           | ☺                     | ☺                | 6                   |
| Kuzmik et al. (2010) <sup>5</sup>     | Cross-sectional | ☺                     | ☺                    | -               | ☺                         | ☺                           | ☺                     | ☺                | 6                   |
| Lee et al. (2017) <sup>6</sup>        | Cross-sectional | ☺                     | ☺                    | -               | ☺                         | ☺                           | ☺                     | ☺                | 6                   |
| Rouchaud et al. (2016) <sup>7</sup>   | Cross-sectional | ☺                     | ☺                    | -               | ☺                         | ☺                           | ☺                     | ☺                | 6                   |
| Schievink et al. (2010) <sup>10</sup> | Cross-sectional | ☺                     | ☺                    | -               | ☺                         | ☺☺                          | ☺                     | ☺                | 7                   |
| Shin et al. (2015) <sup>8</sup>       | Cross-sectional | ☺                     | ☺                    | -               | ☺                         | ☺                           | ☺                     | ☺                | 6                   |
