# Supplementary material for: Prevalence of Intracranial Aneurysm in Patients with Aortopathy: A Systematic Review with Meta-Analyses
Source: PubMed Central journal article supplement — J Stroke. 2020 Jan 31;22(1):76–86. doi: 10.5853/jos.2019.01312 (PMC7005354; doi:10.5853/jos.2019.01312), 2020-01-31
Supplement: jos-2019-01312-suppl9.pdf [file jos-2019-01312-suppl9.pdf]

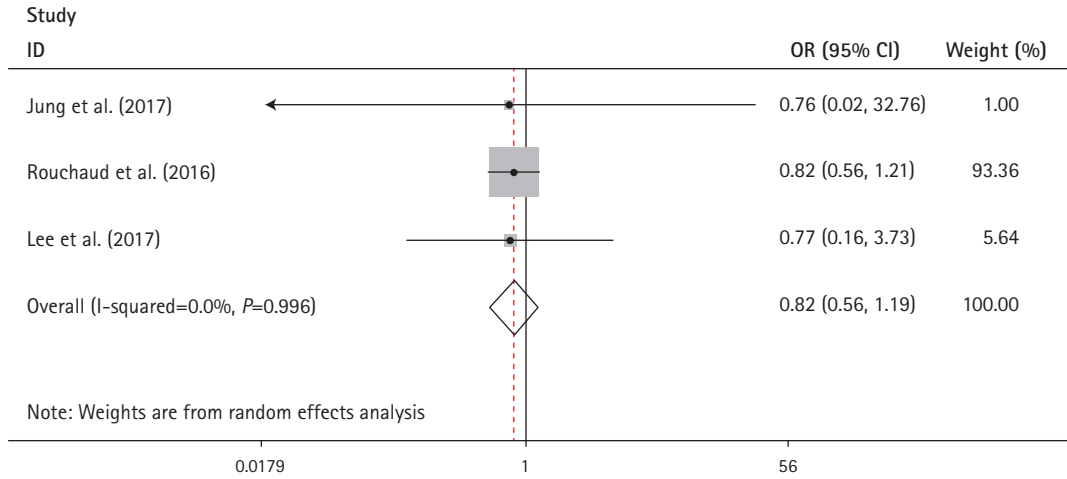

**Supplementary Figure 7.** Individual analysis of risk factors for the presence of intracranial aneurysms in patients with aortic diseases. Odds ratios (ORs) for hyperlipidemia on the prevalence of intracranial aneurysm in patients suffered from aortic disease. CI, confidence interval.
